# Supplementary material for: The Effect of Pro-Inflammatory Conditioning and/or High Glucose on Telomere Shortening of Aging Fibroblasts
Source: PLOS journal article supplement (doi:10.1371/journal.pone.0073756), 2013-09-23

**Supporting Figure S1. Data supporting the method of Mitochondrial DNA (mtDNA) copy number measurement.**

**A)** Mitochondrial single copy gene (*MTND1*) PCR standard curve. **B)** Genomic single copy gene (*RLP0*) PCR standard curve. **C)** Linear regression between measurements of mtDNA copy number measurement with the quantitative PCR in 16 samples acquired on two consecutive days ( $R^2=0.52$ ,  $p=0.002$ ).

**A)**

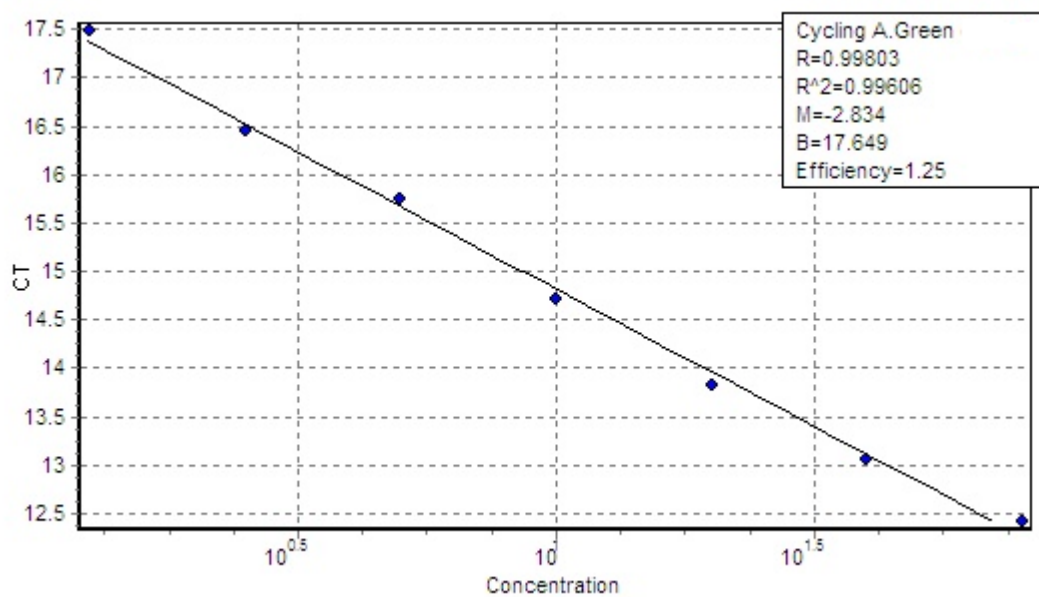

**B)**

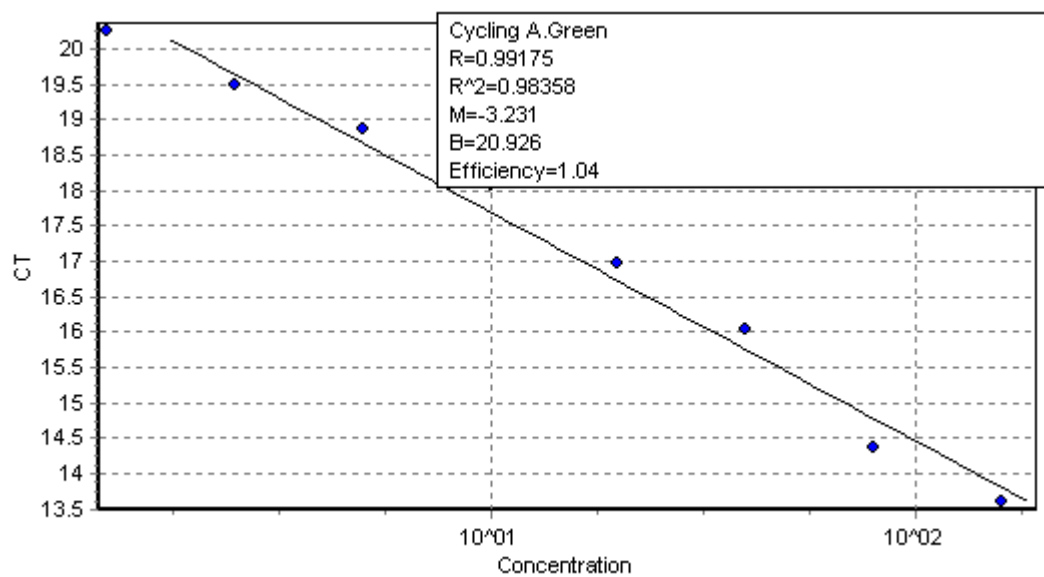

C)

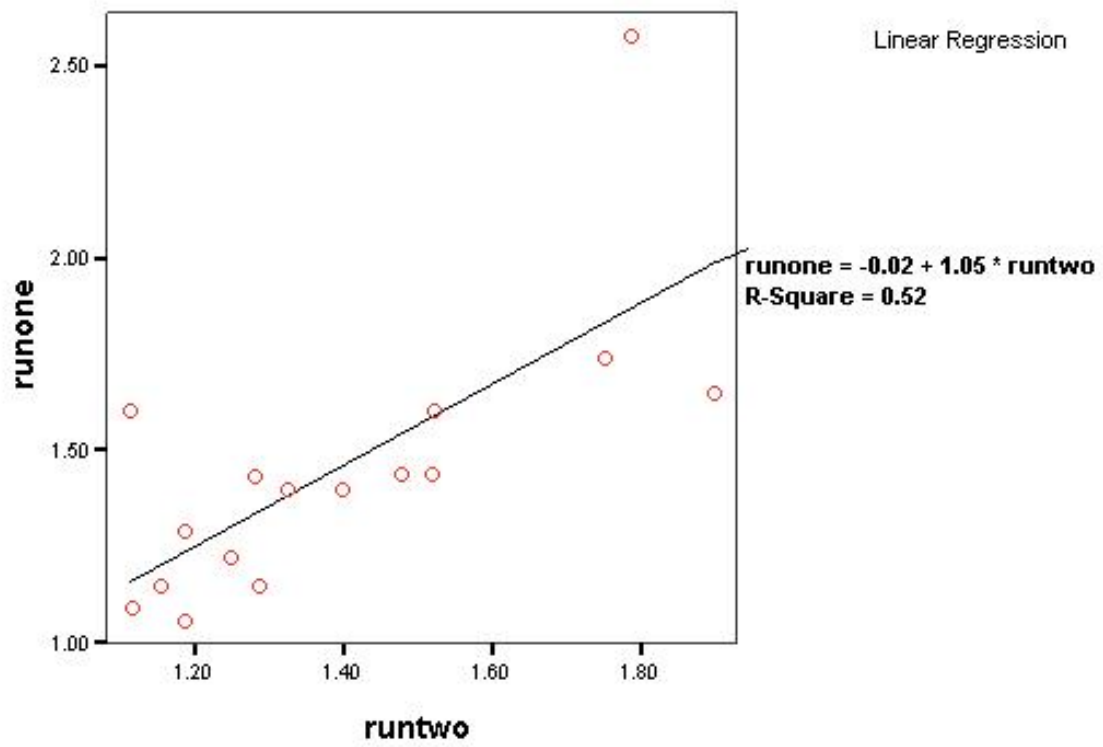

Supplement: S1 (10.1371/journal.pone.0073756.s001) [file journal.pone.0073756.s001]
