# Supplementary material for: The Effect of Pro-Inflammatory Conditioning and/or High Glucose on Telomere Shortening of Aging Fibroblasts
Source: PLOS journal article supplement (doi:10.1371/journal.pone.0073756), 2013-09-23
Supplement: S3 (10.1371/journal.pone.0073756.s003) [file journal.pone.0073756.s003]

**Supporting Figure S3. Microscope pictures of cultures, after 62 days of treatment in each of the experimental conditions.**

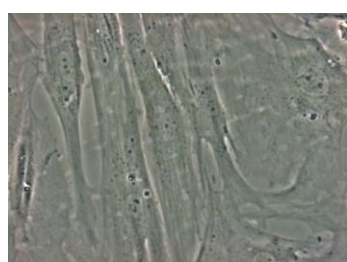

control

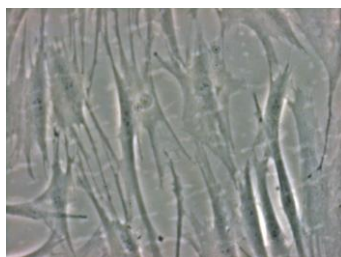

L-glucose

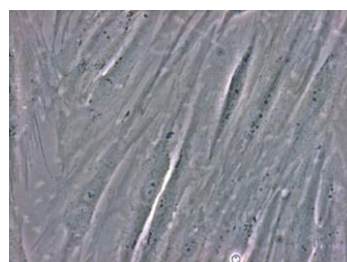

BSO

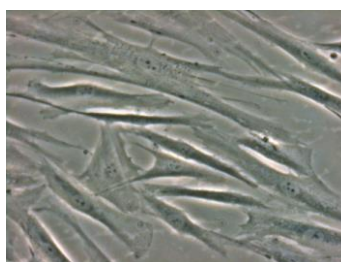

IL1B+ D-glucose

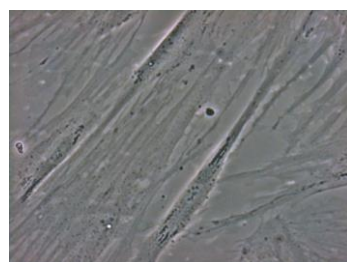

D-glucose

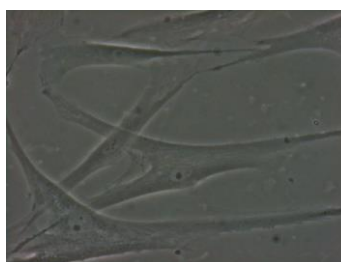

IL1B
