# Supplementary material for: The Effect of Pro-Inflammatory Conditioning and/or High Glucose on Telomere Shortening of Aging Fibroblasts
Source: PLOS journal article supplement (doi:10.1371/journal.pone.0073756), 2013-09-23
Supplement: S5 (10.1371/journal.pone.0073756.s005) [file journal.pone.0073756.s005]

**Supporting Figure S5. The change in *TFAM* expression levels after 45 days of treatment in each of the five conditions.**

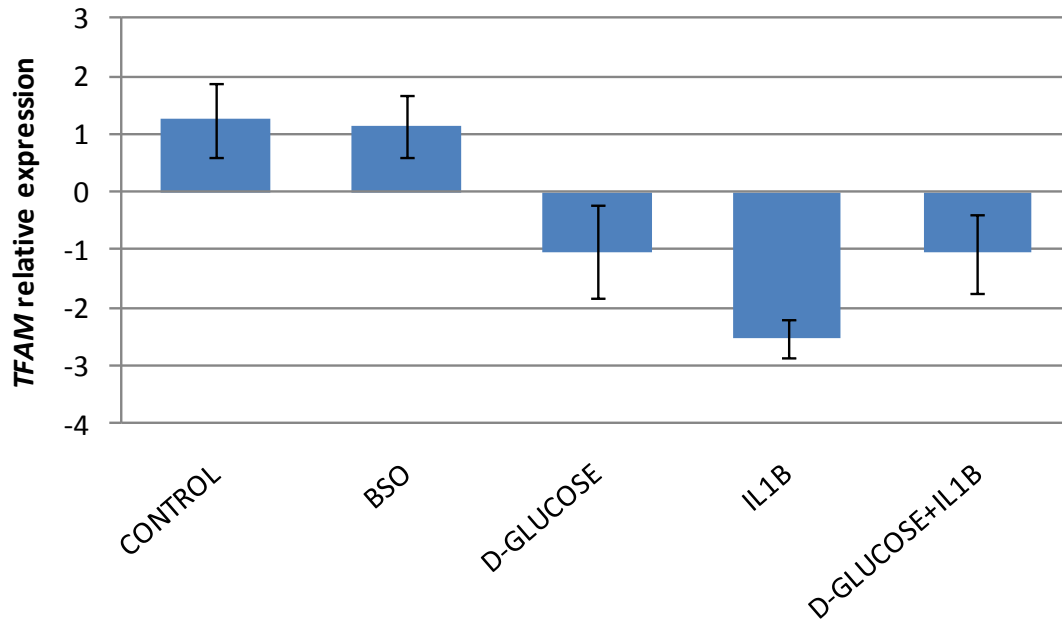

Expression ratio was calculated using the REST software.

The change in *TFAM* expression with each of the five treatments was calculated relatively to the levels of *TFAM* expression in each donor before the beginning of treatment.

There were no significant changes in *TFAM* expression with each of the five treatments.
